# Supplementary material for: Chimeric Antigen Receptor T Cell Therapy Targeting Epithelial Cell Adhesion Molecule in Gastric Cancer: Mechanisms of Tumor Resistance
Source: MDPI journal article supplement (doi:10.3390/cancers15235552), 2023-11-23
Supplement: s1 [file s1]

# Chimeric Antigen Receptor T Cell Therapy Targeting Epithelial Cell Adhesion Molecule in Gastric Cancer: Mechanisms of Tumor Resistance

Yanping Yang <sup>1,2,†</sup>, Raymond Louie <sup>3,†</sup>, Janusz Puc <sup>4</sup>, Yogindra Vedvyas <sup>1,2</sup>, Yago Alcaina <sup>2</sup>, Irene M. Min <sup>1,5</sup>, Matt Britz <sup>4</sup>, Fabio Luciani <sup>6,\*</sup> and Moonsoo M. Jin <sup>1,2,5,\*</sup>

<sup>1</sup> Department of Radiology, Houston Methodist Research Institute, Houston, TX 77030, USA; imin@houstonmethodist.org (I.M.M.)

<sup>2</sup> Molecular Imaging Innovations Institute, Department of Radiology, Weill Cornell Medicine, New York, NY 10065, USA; yalcaina@ratiotx.com

<sup>3</sup> School of Computer Science and Engineering, University of New South Wales (UNSW), Sydney, NSW 2052, Australia; r.louie@unsw.edu.au

<sup>4</sup> AffyImmune Therapeutics, Inc., Natick, MA 01760, USA

<sup>5</sup> Department of Surgery, Weill Cornell Medicine, New York, NY 10065, USA

<sup>6</sup> School of Medical Sciences and Kirby Institute for Infection and Immunity, University of New South Wales (UNSW), Sydney, NSW 2052, Australia

\* Correspondence: luciani@unsw.edu.au (F.L.); mjin@houstonmethodist.org (M.M.J.)

† These authors contributed equally to this work.

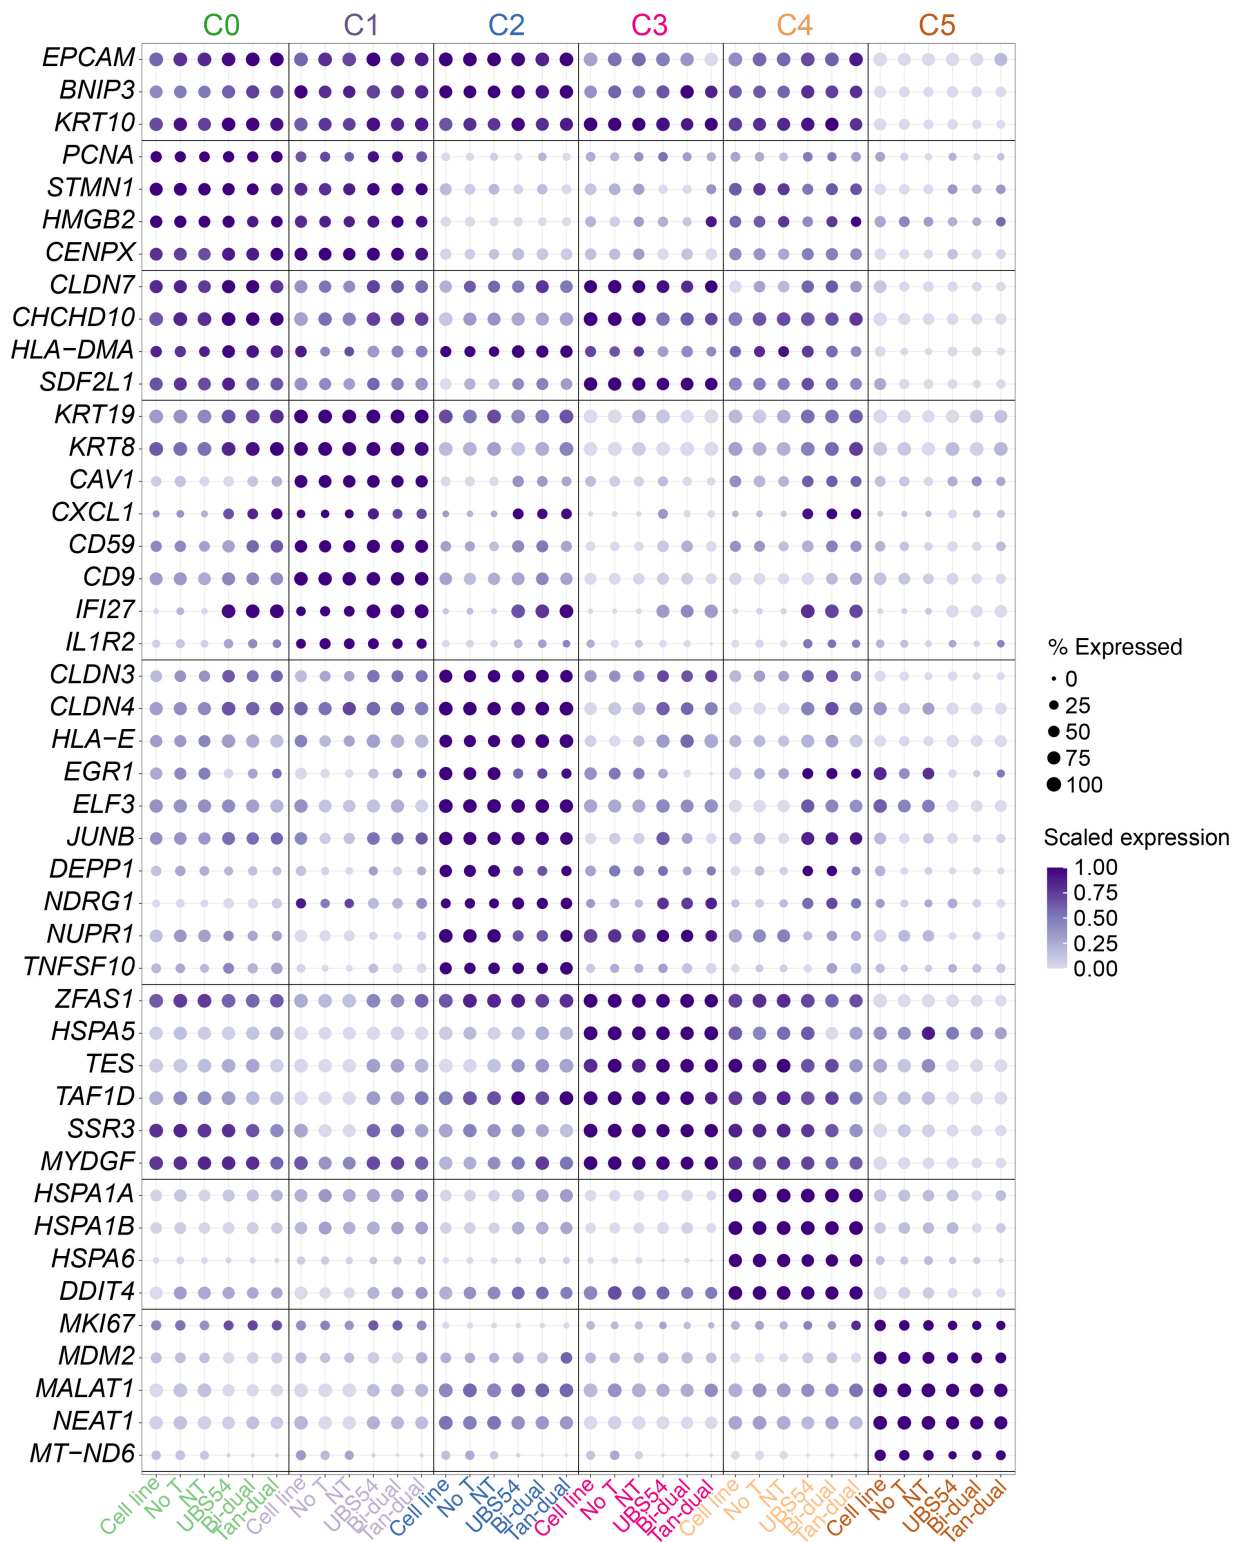

**Figure S1. Dot plots representing cluster genes measured as average gene expression normalized by sample of origin.**

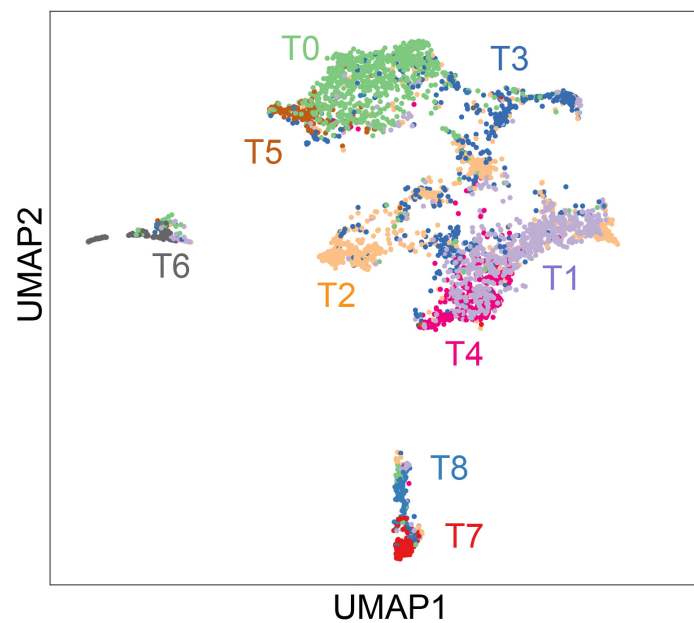

**Figure S2. UMAP based on the scRNA-seq analysis of T cells after regression of cell cycle.**

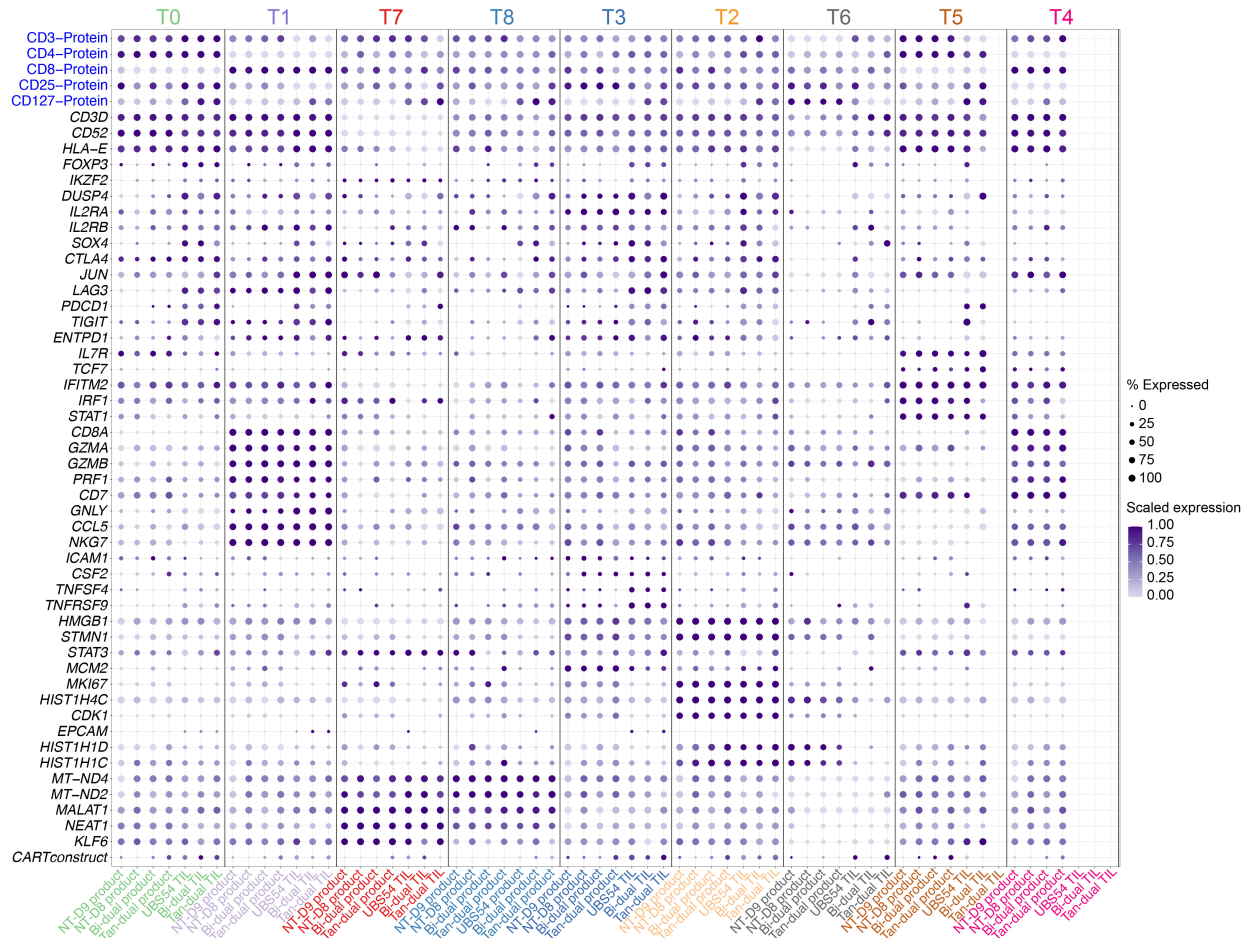

**Figure S3. Dot plot representing cluster genes for each cluster. Each column represent a sample.**



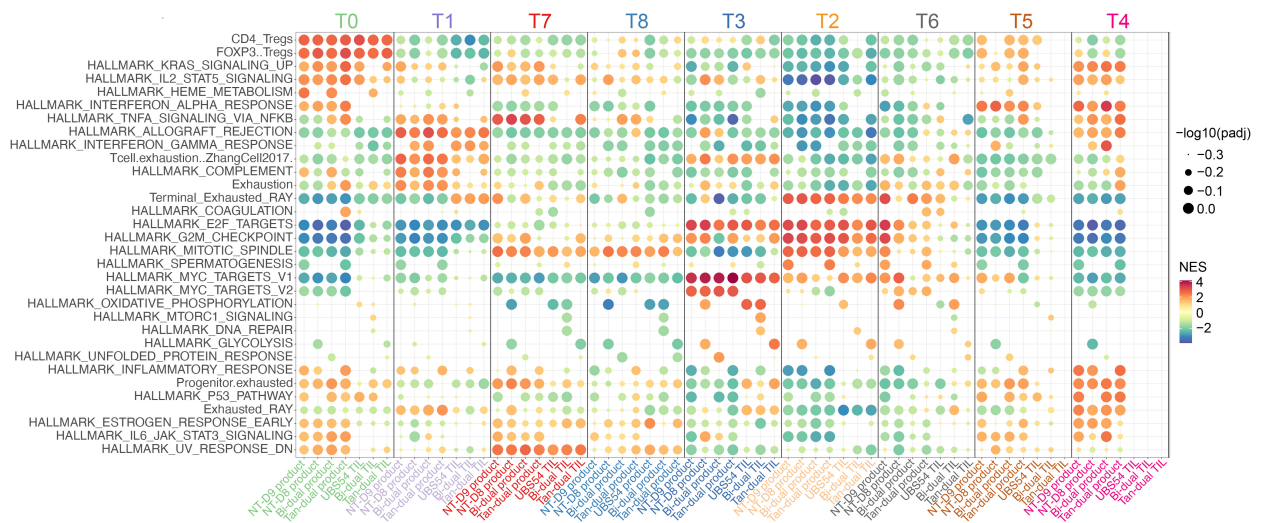

**Figure S4. Dot plot representing GSEA for cluster genes. Each column represent a sample.**
