# Supplementary material for: Chimeric Antigen Receptor T Cell Therapy Targeting Epithelial Cell Adhesion Molecule in Gastric Cancer: Mechanisms of Tumor Resistance
Source: Cancers (Basel). 2023 Nov 23;15(23):5552. doi: 10.3390/cancers15235552 (PMC10705754; doi:10.3390/cancers15235552)
Supplement: Supplementary file 1 [file cancers-15-05552-s001.zip › Supplementary Table S1.xlsx]

## Sheet: GENE_SIGNATURES_TOUSE
CD4_Th1	CD4_Th2	CD4_Th17	CD4_Tfh	CD4 EM	CD4 TRM	CD4_Tregs	FOXP3- Tregs	CD8 EM	CD8 TRM	Gamma Delta	CD8 cytotoxic	NK receptor	NK-like cytotoxicity	NK_like_Suppressive	nk_like_activating	NKT	NK	NK_COMPLETE	Progenitor exhausted	Tcell exhaustion (ZhangCell2017)	Exhaustion	Proliferating T cells	Dendrtitic cells	Mast cells	ILC3	Plasma cells	B cells	Monocytes	Macrophages	Cell cycle
CD4	CD4	CD4	JUNB	IL7R	CD40LG	CD4	LTB	GZMK	CD3G	AREG	APOBEC3C	KIR2DL1	C1orf56	BTLA	C1orf56	CD3D	CCL3	CCL3	ARHGAP26	ACP5	CCL3	PCLAF	CST3	TPSAB1	KIT	IGHA1	CD19	TYROBP	FCGR1A	ANLN
FOS	FTH1	IL17A	MALAT1	LTB	LTB	CTLA4	CD4	NKG7	COTL1	B3GNT7	B2M	KIR2DL2	CCL3	CD160	CCL3	CD8A	CCL4	CCL4	CCR6	ADGRG1	CCL4	STMN1	HLA-DRA	TPSB2	LST1	JCHAIN	MS4A1	FCER1G	CD86	ASPM
KLRB1	KLRB1	IL7R	ICOS	ANXA1	DNAJB1	TBC1D4	ICOS	DUSP2	CD3D	CD247	BLNK	KIR2DL3	CCL4	CD25	CCL4	GNLY	CST7	CCL5	CCR7	AFAP1L2	CD27	HMGN2	HLA-DPA1	CPA3	KRT81	IGLC3	CD27	LYZ	IL1B	BIRC5
JUN	ZFP36L2	CCL20	IKZF1	CXCR4	KLRB1	FOXP3	KLRB1	CST7	CD8A	CLL3	BLNK	KIR2DS1	CCL5	CTLA4	CD3D	NKG7	CTSW	CD160	CD22	AKAP5	CD28	TOP2A	CD74	LTC4S	KRT86	IGKC	CD74	AIF1	ITGAX	CCNA2
DUSP1	ANXA1	LTB	BCL6	GPR183	S100A4	TNFRSF4	SPOCK2	CXCR4	CD8B	CST7	CCL3	KIR2DS2	CD160	ENTPD1	CD8A	GZMH	FCER1G	CD244	CD81	BST2	CD38	DUT	HLA-DRB1	GATA2	TYROBP	SSR4	CD83	CST3	IRF8	CCNB1
GPR183	IL7R	RORA	CXCL13	KLF6	CD4	IL32	MAF	GZMH	SH3BGRL3	CTSW	CCL4	KIR3DL1	CD244	FAS	CD8B	FGFBP2	GNLY	CD247	CD83	CCL3	CTLA4	HMGB2	LYZ	MS4A2	LTB	IGLC2	CD79A	VCAN	HLA-DPA1	CCNB2
JUNB	GPR183	ANXA1	LEF1	CD40LG	IL7R	TNFRSF18	PBXIP1	GZMM	KLRD1	FCER1G	CCL5	KLRC1	CD247	FOXP3	CXCL1	CTSW	GZMA	CD3D	CD9	CCND2	CXCR5	TYMS	HLA-DPB1	HPGDS	PCDH9	MZB1	JCHAIN	LST1	PTGDS	CCND1
KLF6	CXCR4	CCR6	TNFSF8	TNFSF13B	FOS	ICA1	ANKRD12	SH2D1A	CD52	FCGR3A	CD8A	KLRC2	CD3D	IL10	EGR2	PRF1	GZMB	CTSW	CLDN10	CD27	CXCR6	TK1	HLA-DQA1	CD9	AREG	DERL3	IGHA1	CTSS	GPR183	CD63
IL7R	ICOS	GPR183	CXCR5	ICOS	GPR183	BATF	FXYD5	KLRG1	CCL5	FCRL6	CD8B	KLRC3	CTSW	IL4	FCER1G	GZMB	GZMH	CXCL1	CLYBL	CD27-AS1	ENTPD1	HELLS	HLA-DQB1	HDC	FCER1G	IGHA2	SSR4	FCN1	HLA-DRA	CDC20
DNAJB1	S100A4	IL4I1	PDCD1	FOS	JUN	LTB	TNFRSF4	HCST	GZMA	GNLY	CSF1	KLRC4	CXCL1	KIR2DL1	FCGR3A	CCL4	KIR2DL4	EGR2	CNKSR3	CD2BP2	EOMES	TUBA1B	AIF1	TIMP3	LIF	XBP1	IGLC3	SERPINA1	TCL1A	CDCA8
TNF	RGCC	ODF2L	CD40LG	TNFAIP3	GIMAP7	MAF	CTLA4	IFNG	ITGA1	GZMB	CST7	KLRD1	EGR2	KIR2DL4	GNLY	FCGR3A	KLRB1	FCER1G	CXCL10	CD38	FASLG	ZWINT	TYROBP	VWA5A	IL4I1	HSP90B1	IGLC2	FTH1	PLAC8	CDKN3
NEU1	TNFAIP3	TNFAIP3	CXCR4	TSC22D3	CD2	UGP2	CCR7	CCL4	NKG7	GZMK	FASLG	KLRF1	FCER1G	KIR3DL2	IL2RA	IFITM2	KLRC3	FCGR3A	CXCR4	CD63	HAVCR2	MKI67	CD11C_Protein	SLC18A2	IL23R	HERPUD1	IGLL5	MAFB	CD74	CENPE
CD40LG	ARL4C	TNFSF13B	TNFRSF4	S100A11	TXNIP	LAIR2	RNF19A	APOBEC3G	ZEB2	HOPX	GNLY	KLRK1	FCGR3A	KIR3DL3	IRF4	CST7	KLRD1	FCRL6	CXCR4	CHST12	ID3	CD3D	CTSZ	CLU	RORC	UBE2J1	IGHA1	CSTA	IRF8	CENPF
IFNG	MYADM	CD40LG	C-MAF	DNAJB1	ICOS	ICOS	GADD45G	CMC1	CLEC2B	IL2RB	GZMA	LILRB1	FCRL6	KLRC1	KLRC2	NCR3	KLRF1	GNLY	CXCR5	CREM	KLRB1		LST1	SLC45A3	CCR6	TNFRSF17		CD14	TCF4	CEP55
CXCR3	CD40LG	S100A4	IL21	ARL4C	DUSP1	TIGIT	NDUFV2	ITGB2	TIGIT	IRF8	GZMB	NCAM1	GNLY	KLRG1	KLRD1	KLRF1	KLRK1	GZMB	FAM213A	CSF1	LAG3		FCER1G	IL1RL1	CD3D	NEAT1		TSPO	IRF7	CKAP2L
CCR5	TPT1	KLRB1	IL10	ZFP36L2	ANXA1	NAMPT	ICOS	SAMD3	ITGAE	KLRD1	GZMH	NCR1	HOPX	PDCD1	KLRF1	HCST	NCAM1	GZMH	FAM84A	CTLA4	LAYN		IL1B	KIT		CD79A		NEAT1	PPP1R14B	DLGAP5
TBET	PPP1CB	SPOCK2		JUND	JUNB	ARID5B	FAS	CTSW	TNIP3	KRT81	GZMK	NCR2	ID2	TGFB1	KLRK1	KLRD1	NKG7	GZMK	FHIT	CTSD	MAF					SPCS3		NPC2	SOX4	FOXM1
STAT1	CCR4	CD69		JUN	HSPA1B	DNPH1		LYST	CXCR6	MATK	HLA-C	KLRB1	IFNG		LYZ	TYROBP	PRF1	GZMM	FOS	CXCL13	PDCD1					MEF2C		LGALS1	CST3	GTSE1
STAT4	GATA3	IL23R		IFITM2	HSPA1A	TNFRSF1B		DTHD1	KLRB1	NCR1	IFNG		IL18RAP		NCAM1	GZMK	PTGDS	ID2	FOXP1	CXCR6	PRDM1					PIM2		FPR1	RGS2	H2AFZ
TNFAIP3	STAT5	TRAC		KLRB1	CD69	FAS		TNFSF9	KLRC2	NKG7	ITGAM		IL2RA		NCR1		SPON2	IFNG	ID3	DFNB31	PRDX5					FCRL5		IL1B	CCDC50	HIST1H1B
	STAT6			KLF2	ITGAE	IL2RA		CCL5	CD69	PRF1	KLRF1		IL2RB		NCR2		TYROBP	IL18RAP	IFIT3	DUSP4	TBX21					PABPC4			BCL11A	HIST1H1C
	IL4			TNFRSF4	TNF			CRTAM		SH2D1B	KLRG1		IRF4		NCR3		XCL1	IL2RA	IGF1R	ENTPD1	TIGIT					POU2AF1			TYROBP	HIST1H1D
	RUNX2			IFNG	TNFRSF25			CD8A		TNFRSF18	KLRK1		KIR2DL3		NKG7		XCL2	IL2RB	IL7R	ENTPD1-AS1	TIM					CD38			IL3RA	HIST1H1E
	IL5			CD4				CCL4L2		TRDC	LYST		KIR3DL2		SIGLEC7		KLRC1	IRF4	ITGB1	FKBP1A	TNFRSF1B					ICAM2			FCER1G	HIST1H2AJ
	IL13							LYAR		TRDC	NKG7		KLRB1		ZEB2		KLRC4	KIR2DL3	JUN	FUT8	TNFRSF9					IRF4			C12orf75	HIST1H4C
								CD81		TRGC1	PRF1		KLRC1					KIR3DL2	KBTBD11	GALM	TOX					MS4A1				HJURP
								GZMA		TRGC2	TGFB1		KLRC2					KLRB1	KLF4	GZMB										HMGB1
								PTPRC		TYROBP	TNF		KLRC3					KLRC1	KLHL6	HAVCR2										HMGB1P5
								TUBA4A		XCL1	ZEB2		KLRC4					KLRC2	LEF1	HLA-DMA										HMGB2
								CD8B		XCL2			KLRD1					KLRC3	LRIG1	HLA-DRA										HMMR
								LITAF					KLRD1					KLRC4	LTA	HMGN3										KIAA0101
								EOMES					KLRF1					KLRD1	NR4A2	ICOS										KIF11
								S100A10					KLRK1					KLRF1	NTRK3	ID3										KIF14
								GIMAP7					LYZ					KLRK1	PTPN2	IFI35										KIF15
								ARPC5L					NCAM1					MYBL1	PTPN6	IFNG										KIF2C
								GZMB					NCR1					NCAM1	SATB1	IGFLR1										LMNA
								ZEB2					NCR2					NCR1	SELL	IL2RB										MCM3
													NCR3					NCR2	SOX4	ITGAE										MKI67
													NKG7					NCR3	TBX21	ITM2A										NCAPG
													PRF1					NKG7	TCF7	LAG3										NUSAP1
													PTPN4					PRF1	TGFBR3	LAYN										PCNA
													SIGLEC7					TNFAIP3	TOX	LINC00299										PLK1
													TNFAIP3					XCL1		LYST										PRC1
													ZEB2							MIR155HG										STMN1
																				MIR4632										TK1
																				MS4A6A										TOP2A
																				MTHFD1										TPX2
																				MTHFD2										TUBA1B
																				MYO1E										TUBB
																				MYO7A										TYMS
																				NAB1										UBE2C
																				NDFIP2
																		XCL2		PARK7										RRM2
																				PDCD1										SMC4
																				PHLDA1
																				PKM
																				PRDM1
																				PRDX5
																				PRF1
																				PRKAR1A
																				RAB27A
																				RALGDS
																				RGS1
																				RGS2
																				SARDH
																				SIRPG
																				SNAP47
																				SNX9
																				STAT3
																				SYNGR2
																				TIGIT
																				TNFRSF1B
																				TNFRSF9
																				TOX
																				TPI1
																				TRAFD1
																				UBE2F
																				UBE2F-SCLY
																				VAPA
																				VCAM1
																				WARS
																				YARS
